# Supplementary material for: Response to Commentary: The framework for systematic reviews on psychological risk factors for persistent somatic symptoms and related syndromes and disorders (PSY-PSS)
Source: Front Psychiatry. 2024 Feb 8;15:1359434. doi: 10.3389/fpsyt.2024.1359434 (PMC10881664; doi:10.3389/fpsyt.2024.1359434)
Supplement: Supplementary file 1 [file Table_1.xlsx]

## Sheet: Search terms
Search terms for persistent somatic symptoms and related syndromes and disorders
Developed by Anne Toussaint, Paul Hüsing, Abigail Smakowski, Maria Kleinstäuber, Bernd Löwe & Meike Shedden-Mora
This list is based on: Berezowski, L., Ludwig, L., Martin, A., Löwe, B., & Meike C. Shedden-Mora. (2021). Early psychological interventions for somatic symptom disorder and functional somatic syndromes: a systematic review and meta-analysis. Psychosomatic Medicine, 84(3), 325-338. doi:10.1097/PSY.0000000000001011
This list is part of the PSY-PSS framework for systematic reviews on psychological risk factors for persistent somatic symptoms and related syndromes and disorders (PSY-PSS)
Address for correspondence: Meike Shedden-Mora, Medical School Hamburg, meike.shedden-mora@medicalschool-hamburg.de
Specialty	Condition	Related conditions	Search terms	Anmerkungen VF
General (non-specific) Terms	Functional	Functional disorder	"Functional disorder*" OR "Idiopathic" OR "Dissociative" OR "Mimic*" OR "Mimick*"	Mimic and Mimick by itself brings diffuse results
		Functional symptom	"Functional symptom"
		Functional syndrome	"Functional syndrome"
		Functional somatic	"Functional somatic"
		Functional illness	"Functional illness"
		Non-organic	"Non-organic" OR "Non-specific"
		Psychogenic	"Psychogenic"
General Practitioner	Subjective symptoms	Subjective stomach pain	"Subjective stomach pain"
		Subjective back pain	"Subjective back pain"
		Subjective pain	"Subjective pain"
		Subjective headache	"Subjective headache"
		Subjective chest pain	"Subjective chest pain"
		Subjecitve dizziness	"Subjective dizziness"
		Subjective fainting	"Subjective fainting"
		Subjecitve shortness of breath	"Subjective shortness of breath"
		Subjective constipation	"Subjective constipation"
		Subjective nausea	"Subjective nausea"
	Medically unexplained	Medically unexplained	"Medically unexplained"
		Organically unexplained	"Organically unexplained" OR "unexplained"
		Psychosomatic	"Psychosomatic"
		Somatoform	"Somatoform"
		Persistent physical symptoms	"Persistent physical symptoms"
		Persistent somatic symptoms	"Persistent somatic symptoms"
Psychiatric/Psychosomatic	Dissociative Disorders - ICD-11	Dissociative neurological symptom disorder	"Dissociative neurological symptom disorder"
		Dissociative amnesia	"Dissociative amnesia"
	Dissociative Disorders- ICD-10	Mixed dissociative disorder	"Mixed dissociative disorder"
		Dissociative fugue	"Dissociative fugue"
		Dissociative stupor	"Dissociative stupor"
		Dissociative motor disorder	"Dissociative motor disorder"
		Dissociative convulsion	"Dissociative convulsion"
		Dissociative anaesthesia	"Dissociative anaesthesia"
		Dissociative sensory loss	"Dissociative sensory loss"
		Other dissociative disorder	"Other dissociative disorder"
	Multisomatoform disorder	Multisomatoform	"Multisomatoform"
	Somatization disorder	Somatization	"Somatization"
		Somatisation	"Somatisation"
		Briquet syndrome	"Briquet syndrome"
	Pain disorder	Pain disorder	"Pain disorder*"
	Conversion disorder	Conversion disorder	"Conversion"
		Hysteria	"Hysteria"
		Hysteric	"Hysteric"
	Somatic symptom disorder	Somatic symptom disorder	"Somatic symptom disorder*
		Somatic symptom distress	"somatic symptom distress"
		Somatic symptom and related disorders	"somatic symptom and related disorders"
	Bodily distress disorder	Bodily distress disorder	"bodily distress disorder"
		Bodily distress syndrome	"bodily distress syndrome"
		Bodily distress	"bodily distress"
		Body distress	"body distress"
		Bodily stress	"bodily stress"
		Body stress	"body stress"
	Culture-bound syndrome	Culture-bound syndrome	"Culture-bound syndrome" OR "Culture bound syndrome" OR "Culture-bound"
		Culture-specific syndrome	"Culture-specific syndrome" OR "Culture-specific"
		Culture-bound symptom	"Culture-bound symptom"
		Culture-specific symptom	"Culture-specific symptom"
Allergology	Food intolerance	Food intolerance	"Food intolerance"
		Food sensitivity	"Food sensitivity" OR "Food sensitivities"
		Food hypersensitivity	"Food hypersensitivity" OR "Food hypersensitivities"
		Pseudo-allergy	"Pseudo-allergy" OR "Pseudo-allergies"
		Functional food intolerance	"Functional food intolerance"
		Functional food sensitivity	"Functional food sensitivity" OR "Functional food sensitivities"
		Functional food hypersensitivity	"Functional food hypersensitivity"
		Functional food allergy	"Functional food allergy" OR "Food allergy" OR "Food allergies"
	Multiple chemical sensitivity	chemical sensitivity	"chemical sensitivity" OR "chemical sensitivities"
		Idiopathic environmental	"Idiopathic environmental"
	Sick building syndrome	Sick building	"Sick building" OR "Sick house"
	Persian gulf syndrome	Persian gulf syndrome	"Persian gulf syndrome"
		Gulf war syndrome	"Gulf war syndrome"
	Amalgam hypersensitivity	Amalgam hypersensitivity	"Amalgam hypersensitivity"
		Functional amalgam hypersensitivity	"Functional amalgam hypersensitivity"
		Functional amalgam toxicity	"Functional amalgam toxicity"
	Implant intolerance	Implant intolerance	"Implant intolerance"
	Prothesis intolerance	Prothesis intolerance	"Prothesis intolerance"
	Aerotoxic syndrome	Aerotoxic	"Aerotoxic" OR "sick aeroplane"
		Cabin contamination	"Cabin contamination"
	Wind turbine syndrome	Wind turbine syndrome	"Wind turbine syndrome"
		Wind farm syndrome	"Wind farm syndrome"
	Electromagnetic hypersensitivity	Electromagnetic hypersensitivity	"Electromagnetic hypersensitivity" OR "Electromagnetic-hypersensitivity" OR "Environmental illness*"
		Idiopathic environmental intolerance attributed to electromagnetic fields	"Idiopathic environmental intolerance attributed to electromagnetic fields"
		Electrohypersensitivity	"Electrohypersensitivity" OR "OR IEI-EMF"
		Electro-sensitivity	"Electro-sensitivity" OR "Electrosensivity" OR "Electro-sensivity"
		Electrical sensitivity	"Electrical sensitivity"
		Wi-Fi allergy	"Wi-Fi allergy"
Anesthesiology	Idiopathic pain	Idiopathic pain	"Idiopathic pain"
		Panalgesia	"Panalgesia"
		Psychogenic pain	"Psychogenic pain"
		Functional pain	"Functional pain"
		Unspecific pain	"Unspecific pain"
	Chronic postoperative pain	Chronic postoperative	"Chronic postoperative"
Cardiology	Atypical chest pain	Atypical chest pain	"Atypical chest pain"
		Nonspecific chest pain	"Nonspecific chest pain"
		Non-specific chest pain	"Non-specific chest pain"
		Noncardiac chest pain	"Noncardiac chest pain"
		Non-cardiac chest pain	"Non-cardiac chest pain"
		Functional chest pain	"Functional chest pain"
	Palpitations with normal investigations	Psychogenic palpitation	"Psychogenic palpitation*"
		Functional palpitation	"Functional palpitation*"
	Syndrome X	Syndrome X	"Syndrome X*"
		Microvascular angina	"Microvascular angina"
Dermatology	Psychogenic skin disease	Psychogenic skin disease	"Psychogenic skin disease*"
		Psychogenic pruritus	"Psychogenic pruritus"
		Functional skin	"Functional skin"
Endocrinology	Hypoglycaemia	Psychogenic hypoglycaemia	"Psychogenic hypoglycaemia"
		Psychogenic hypoglycemia	"Psychogenic hypoglycemia"
		Idiopathic postprandial syndrome	"Idiopathic postprandial syndrome"
		Functional hypoglycaemia	"Functional hypoglycaemia"
		Functional hypoglycemia	"Functional hypoglycemia"
Gastroenterology	Functional gastrointestinal disorders	Functional gastrointestinal	"Functional gastrointestinal"
	Disorders of the gut-brain-interaction	brain-gut interaction	"brain-gut interaction"
	Functional bowel syndrome	Irritable bowel	"Irritable bowel" OR "Mucous colitis" OR "Mucous colitides"
		Irritable colon	"Irritable colon" OR "IRS"
		IBS	"IBS"
		irritable bowel syndrome	"irritable bowel syndrome"
		Functional chest pain	"Functional chest pain"
		Functional heartburn	"Functional heartburn"
		Reflux hypersensitivity	"Reflux hypersensitivity"
		Functional dysphagia	"Functional dysphagia"
		Belching disorder	"Belching disorder"
		Rumination syndrome	"Rumination syndrome"
		Chronic nausea vomiting syndrome	"Chronic nausea vomiting syndrome"
		Cyclic vomiting syndrome	"Cyclic vomiting syndrome"
		Functional constipation	"Functional constipation"
		Functional diarrhea	"Functional diarrhea"
		Functional bloating	"Functional bloating"
		Functional distention	"Functional distention"
		Functional bowel disorder	"Functional bowel disorder" OR "Functional bowel"
		Functional abdominal pain	"Functional abdominal pain"
		Centrally mediated abdominal pain syndrome	"Centrally mediated abdominal pain syndrome"
		Functional biliary pain	"Functional biliary pain"
		Levator ani syndrome	"Levator ani syndrome"
		unspecified functional anorectal pain	"unspecified functional anorectal pain"
		Proctalgia fugax	"Proctalgia fugax"
		Mucous colitis	"Mucous colitis"
	Nonulcer dyspepsia	Nonulcer dyspepsia	"Nonulcer dyspepsia"
		Functional dyspepsia	"Functional dyspepsia"
	Functional Abdominal pain	Functional abdominal	"Functional abdominal"
		Psychogenic abdominal	"Psychogenic abdominal"
	Functional colonical disease	Functional colonical	"Functional colonical"
	Functional disorders of swallowing	Functional swallowing	"Functional swallowing"
		Psychogenic dysphagia	"Psychogenic dysphagia"
	Globus syndrome	Globus syndrome	"Globus syndrome*"
		Globus hystericus	"Globus hystericus"
		Globus pharyngeus	"Globus pharyngeus" OR "Globus pharynges"
		Functional globus	"Functional globus"
		Globus sensation	"Globus sensation*"
Gynecology & Urology	Premenstrual syndrome	Premenstrual syndrome	"Premenstrual syndrome"
		Late luteal phase dysphoria	"Late luteal phase dysphoria" OR "Late luteal phase dysphoric" OR "PMDD"
		Premenstrual tension	"Premenstrual tension*"
	Functional urologic disorders	Functional urologic	"Functional urologic"
		Functional urinary	"Functional urinary"
		Functional micturition	"Functional micturition"
		Micturition dysfunction	"Micturition dysfunction"
		Psychogenic urinary retention	"Psychogenic urinary retention" OR "Fowler's syndrome"
		Functional urinary retention	"Functional urinary retention"
	Paruresis	Paruresis	"Paruresis"
		Shy-bladder	"Shy-bladder" OR "shy bladder"
		Bashful bladder	"Bashful bladder"
	Dysfunctional voiding	Dysfunctional voiding	"Dysfunctional voiding"
		Hinman-Allen	"Hinman-Allen" OR "Hinman"
		Nonneurogenic neurogenic bladder	"Nonneurogenic neurogenic bladder"
	Idiopathic overactive bladder	Idiopathic overactive bladder	"Idiopathic overactive bladder"
		Irritable bladder	"Irritable bladder"
	Interstitital cystitis	Interstitial cystitis	"Interstitial cystitis" OR "Interstitial cystitides" OR "Bladder pain" OR "Painful bladder"[
	Urethral syndrome	Urethral syndrome	"Urethral syndrome*"
	Chronic pelvic pain syndrome	Chronic pelvic pain	"Chronic pelvic pain" OR "Pelvic Pain" OR "Unspecific pelvic pain" OR "Unexplained pelvic pain"
		CPPS	"CPPS"
	Pelvic arthropathy	Pelvic arthropathy	"Pelvic arthropathy"
Infectiology	Chronic lyme disease	Chronic lyme	"Chronic lyme"
	Candida hypersensitivity	Candida hypersensitivity	"Candida* hypersensitivity"
		Candida syndrome	"Candida syndrome"
	Chronic rhinopharyngitis	Chronic rhinopharyngitis	"Chronic rhinopharyngitis"
Neurology		Functional neurologic	"Functional neurologic*" OR "General functional neurologic*" OR "Mixed functional neurologic*"
	Functional seizures	Functional seizure	"Functional seizure*"
		Non-epileptic seizure	"Non-epileptic seizure*"
		PNES	"PNES"
		Pseudoseizure	"Pseudoseizure*"
		Pseudo-seizure	"Pseudo-seizure*"
		non-specific seizure	"non-specific seizure"
		Hysterical seizure	"Hysterical seizure*"
		Non-epileptic attack	"Non-epileptic attack*"
		Dissociative seizure	"Dissociative seizure"
		Dissociative attack	"Dissociative attack*"
	Functional voice disorder	Functional voice	"Functional voice"
		Functional dysphonia	"Functional dysphonia"
		Functional aphonia	"Functional aphonia"
		Muscle tension voice disorder	"Muscle tension voice disorder*"
		Psychogenic voice	"Psychogenic voice"
	Functional motor disorder	Functional motor	"Functional motor"
		Functional movement	"Functional movement"
		Functional sensorimotor	"Functional sensorimotor"
		Functional weakness	"Functional weakness*"
		Functional leg	"Functional leg"
		Functional limb	"Functional limb"
		Functional arm	"Functional arm"
		Functional paralysis	"Functional paralysis"
		Functional tremor	"Functional tremor"
		Functional dystonia	"Functional dystonia"
		Posttraumatic painful torticollis	"Posttraumatic painful torticollis"
		Functional jerk	"Functional jerk*"
		Functional tic	"Functional tic*"
		Functional myoclonus	"Functional myoclonus"
		Functional paroxysmal	"Functional paroxysmal"
		Functional gait	"Functional gait"
		Movement disorder mimic	"Movement disorder mimic*"
		Neurologic mimic	"Neurologic mimic*"
		Musculoskeletal mimic	"Musculoskeletal mimic*"
		Biomechanical mimic	"Biomechanical mimic*"
		Isolated disequilibrium	"Isolated disequilibrium"
		Functional balance	"Functional balance"
		Functional parkinsonism	"Functional parkinsonism"
	Functional eye movement disorder	Functional eye	"Functional eye"
		Functional convergence spasm	"Functional convergence spasm*"
		Functional convergence paralysis	"Functional convergence paralysis"
		Functional gaze limitation	"Functional gaze limitation*"
		Functional eye oscillation	"Functional eye oscillation*"
		Functional nystagmus	"Functional nystagmus"
		Functional opsoclonus	"Functional opsoclonus"
		Functional tonic eye deviation	"Functional tonic eye deviation*"
		Functional oculogyric crisis	"Functional oculogyric crisis"
		Functional diplopia	"Functional diplopia"
		Functional tonic gaze deviation	"Functional tonic gaze deviation"
	Functional facial movement disorder	Functional facial	"Functional facial"
		Functional tongue	"Functional tongue"
	Functional tongue movement disorder	Psychogenic blepharospasm	"Psychogenic blepharospasm"
		Functional blepharospam	"Functional blepharospam"
		Functional oromandibular dystonia	"Functional oromandibular dystonia"
		Functional facial dystonia	"Functional facial dystonia"
	Functional sensory symptoms	Functional sensory	"Functional sensory"
		Functional hypoesthesia	"Functional hypoesthesia"
		Functional Hyperesthesia	"Functional Hyperesthesia"
		Functional Hemihyperesthesia	"Functional Hemihyperesthesia"
		Functional Paresthesia	"Functional Paresthesia"
	Functional visual symptoms	Functional visual loss	"Functional visual loss" OR "Functional visual"
	Functional speech disorder	Functional speech	"Functional speech"
		Functional stuttering	"Functional stuttering"
		Functional dysfluency	"Functional dysfluency"
		Functional articulation	"Functional articulation"
		Prosodic abnormality	"Prosodic abnormality" OR" Prosodic abnormalities"
		Foreign accent syndrome	"Foreign accent syndrome*"
		Abnormal resonance	"Abnormal resonance"
		Hypernasality	"Hypernasality"
	Functional memory disorder	Functional memory	"Functional memory"
	Functional cognitive disorder	Functional cognitive	"Functional cognitive"
		Functional amnesia	"Functional amnesia"
	Functional dizziness	Functional dizziness	"Functional dizziness"
		Phobic postural vertigo	"Phobic postural vertigo"
		Chronic subjective dizziness	"Chronic subjective dizziness"
		Persistent postural-perceptual dizziness	"Persistent postural-perceptual dizziness"
		Subjective dizziness	"Subjective dizziness"
		Chronic dizziness	"Chronic dizziness"
		Persistent dizziness	"Persistent dizziness"
	Functional stroke	Functional stroke	"Functional stroke"
		Stroke mimic	"Stroke mimic*"
	Tension headache	Tension headache	"Tension headache"
		Tension-type headache	"Tension-type headache"
		Tension type headache	"Tension type headache"
		Tension-vascular headache	"Tension-vascular headache"
		Tension vascular headache	"Tension vascular headache"
		Stress headache	"Stress headache"
		Functional headache	"Functional headache"
	Atypical face pain	Atypical face pain	"Atypical face pain" OR "Facial pain"
		Myofacial pain	"Myofacial pain"
		Functional face pain	"Functional face pain" OR "Functional facial pain"
	Central sensitivity syndrome	Central sensitivity	"Central sensitivity"
	Post-concussion syndrome	Post concussion	"Post concussion" OR "Post-concussive" OR "Post concussive"
		Post-traumatic complaints	"Post-traumatic complaints"
	Chronic fatigue syndrome	CFS	"CFS"
		Chronic fatigue	"Chronic fatigue" OR "low natural killer cell syndrome" OR "low natural killer cell syndromes"
	Myalgic encephalomyelitis	ME/CFS	"ME/CFS" OR "ME" OR "CFS"	diffuse results for ME
		Myalgic encephalomyelitis	"Myalgic encephalomyelitis" OR "myalgic encephalopathy"
	Neurasthenia	Neurasthenia	"Neurasthenia"
	Post-viral fatigue syndrome	Post-viral fatigue	"Post-viral fatigue"
		chronic epstein barr virus	"chronic epstein barr virus" OR "chronic epstein-barr virus"
		chronic mononucleosis	"chronic mononucleosis"
		chronic infectious mononucleosis like	"chronic infectious mononucleosis like"
		chronic fatigue and immune	"chronic fatigue and immune"
		effort syndrome	"effort syndrome*"
		neuromyasthenia	"neuromyasthenia"
		postviral syndrome	"postviral syndrome*"
		post-viral syndrome	"post-viral syndrome*"
		post viral syndrome	"post viral syndrome*"
		post infectious fatigue	"post infectious fatigue" OR "post-infections fatique" OR "postinfectious fatigue"
		Fatigue syndrome	"Fatigue syndrome"
		Psychogenic fatigue	"Psychogenic fatigue"
		systemic exertion intolerance	"systemic exertion intolerance"
Oral medicine/Otorhinolaryngology	Temporomandibular joint disorder	Temporomandibular joint	"Temporomandibular joint" OR "Temporo-mandibular joint"
		Temporomandibular disorder	"Temporomandibular disorder*"
		Temporo-mandibular disorder	"Temporo-mandibular disorder*"
		Temporomandibular dysfunction	"Temporomandibular dysfunction*"
		Temporo-mandibular dysfunction	"Temporo-mandibular dysfunction*"
		TMJD	"TMJD" OR "TMJ"
		Craniomandibular disorder	"Craniomandibular disorder*"
		Cranio-mandibular disorder	"Cranio-mandibular disorder"
	Atypical odontalgia	Atypical odontalgia	"Atypical odontalgia*"
		Functional odontalgia	"Functional odontalgia*"
	Psychogenic gagging	Psychogenic gagging	"Psychogenic gagging"
		Functional gagging	"Functional gagging"
	Burning mouth	Burning mouth	"Burning mouth"
		Glossalgia	"Glossalgia*"
		Glossodynia	"Glossodynia*"
		Glossopyrosis	"Glossopyrosis" OR "Glossopyroses"
	Bruxism	Bruxism	"Bruxism"
Orthopedics	Repetitive strain injury	Repetitive strain	"Repetitive strain" OR "Cumulative trauma disorder" OR "Cumulative trauma disorders"
		Repetition strain	"Repetition strain"
		Overuse injury	"Overuse injury" OR "Overuse injuries"
		Overuse syndrome	"Overuse syndrome*"
		Repetitive stress	"Repetitive stress"
		Repetitive motion	"Repetitive motion"
	Chronic whiplash syndrome	Chronic whiplash	"Chronic whiplash"
		Whiplash associated	"Whiplash associated"
		Functional neck pain	"Functional neck pain"
Respiratory Medicine	Hyperventilation syndrome	Hyperventilation syndrome	"Hyperventilation syndrome*"
Rheumatology	Fibromyalgia	Fibromyalgia	"Fibromyalgia"
		FMS	"FMS"
		Chronic widespread pain	"Chronic widespread pain"
		Widespread musculoskeletal pain	"Widespread musculoskeletal pain"
		Myofascial pain	"Myofascial pain"
	Chronic low back pain	Nonspecific back pain	"Nonspecific back pain" OR "Non-specific back pain"
		Low back pain	"Low back pain" OR "Lower back pain"
		Functional back pain	"Functional back pain"
	Chronic pain	Chronic pain	"Chronic pain"
	Persistent pain	Persistent pain	"Persistent pain"
	Chronic intractable benign pain syndrome	Chronic intractable benign pain	"Chronic intractable benign pain"
